# Supplementary material for: Relevance of cortisol and copeptin blood concentration changes in an experimental pain model
Source: PubMed Central journal article supplement (PMC8934351; doi:10.1038/s41598-022-08657-4), 2022-03-19
Supplement: 41598_2022_8657_MOESM1_ESM.pdf [file 41598_2022_8657_MOESM1_ESM.pdf]

## SUPPLEMENTARY INFORMATION

To

### Relevance of cortisol and copeptin blood concentration changes in an experimental pain model

Claudine A. Blum, Laëtitia Velly, Christine Brochet, Frédéric Ziegler, Marie-Pierre Tivolacci, Pierre Hausfater,  
Virginie Eve Lvovschi

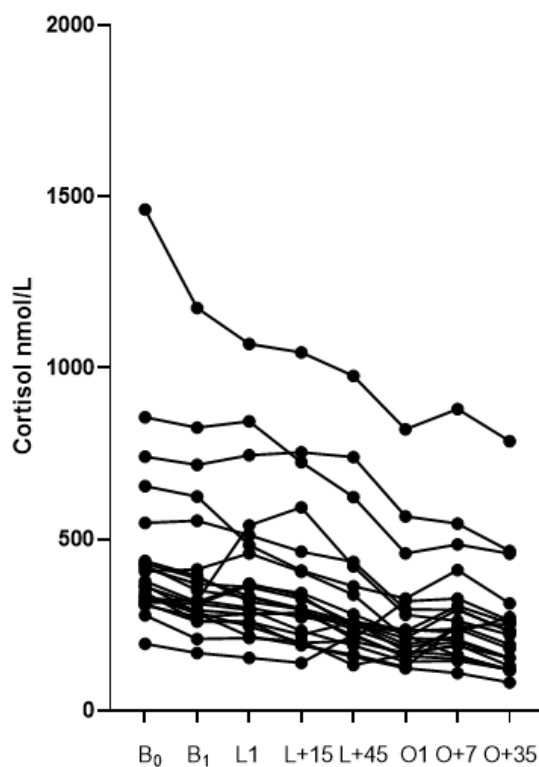

**Supplemental Figure 1. Individual cortisol values at each measured time point.**

B<sub>0</sub>: Baseline measurement

B<sub>1</sub>: Baseline measurement after 10 minutes rest

L1: Time point when reaching target pain

L+15: Time point L1 plus 15 minutes

L+45: Time point L1 plus 45 minutes

O1: Time point of administration of opioids in addition to target pain

O+7: 7 minutes after O1

O+35: 35 minutes after O1

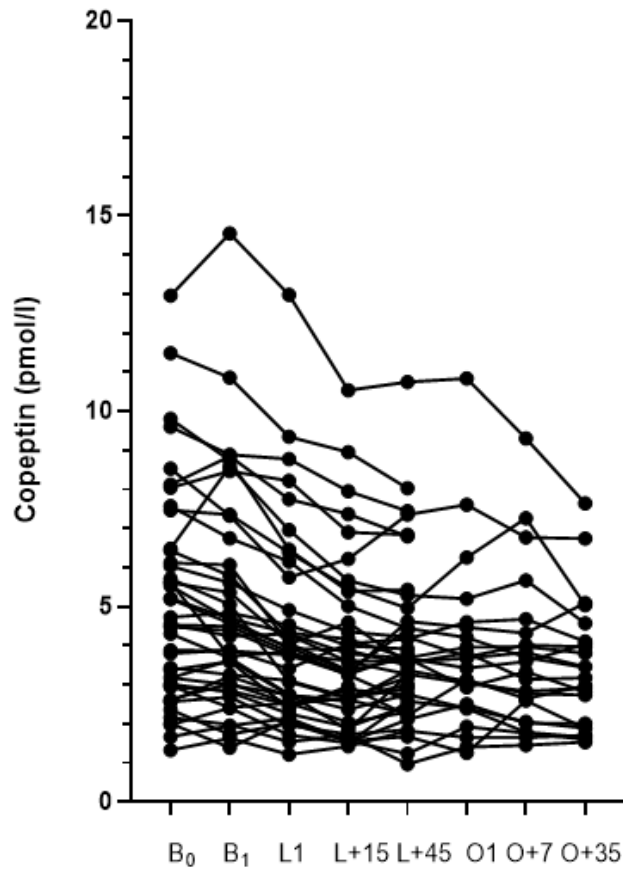

**Supplemental Figure 1. Individual copeptin values at each measured time point.**

B<sub>0</sub>: Baseline measurement

B<sub>1</sub>: Baseline measurement after 10 minutes rest

L1: Time point when reaching target pain

L+15: Time point L1 plus 15 minutes

L+45: Time point L1 plus 45 minutes

O1: Time point of administration of opioids in addition to target pain

O+7: 7 minutes after O1

O+35: 35 minutes after O1
